# Supplementary material for: Genetic analysis of heterotic loci detected in a cross between indica and japonica rice (Oryza sativa L.)
Source: PubMed Central journal article supplement — Breed Sci. 2011 Dec 15;61(4):380–8. doi: 10.1270/jsbbs.61.380 (PMC3406766; doi:10.1270/jsbbs.61.380), 2011-12-15
Supplement: 61_380_1.pdf [file 61_380_1.pdf]

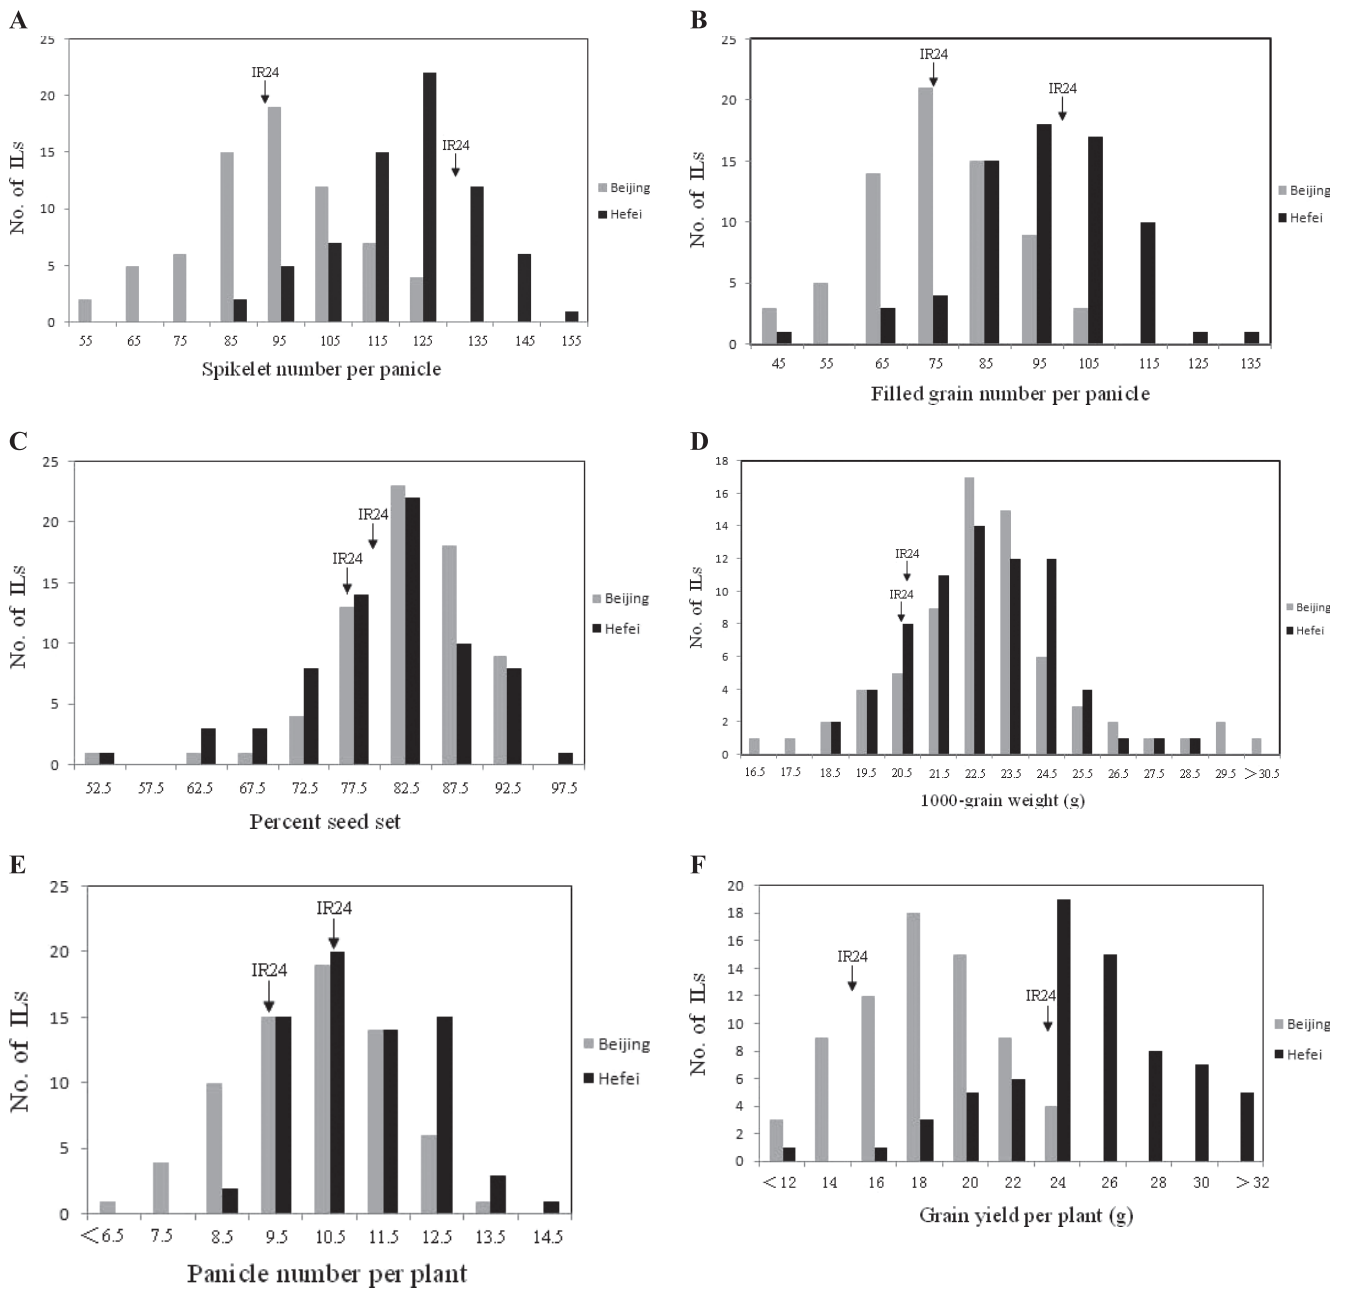

**Supplemental Fig. 1.** Frequency distribution of six yield-related traits for ILs and testcross  $F_1$ s. ILs were generated from a cross between IR24, a *indica* cultivar, as the recurrent parent, and Asominori, a typical *japonica* cultivar, as the donor parent. Testcross  $F_1$ s derived from the cross between ILs. (A) Frequency distribution of spikelet number per plant in ILs; (B) Frequency distribution of filled grain number per plant in ILs; (C) Frequency distribution of percent seed set in ILs; (D) Frequency distribution of 1000-grain weight in ILs; (E) Frequency distribution of panicle number per plant in ILs; (F) Frequency distribution of grain yield per plant in ILs; (G) Frequency distribution of spikelet number per plant in testcross  $F_1$ s; (H) Frequency distribution of filled grain number per plant in testcross  $F_1$ s; (I) Frequency distribution of percent seed set in testcross  $F_1$ s; (J) Frequency distribution of 1000-grain weight in testcross  $F_1$ s; (K) Frequency distribution of panicle number per plant in testcross  $F_1$ s; (L) Frequency distribution of grain yield per plant in testcross  $F_1$ s.

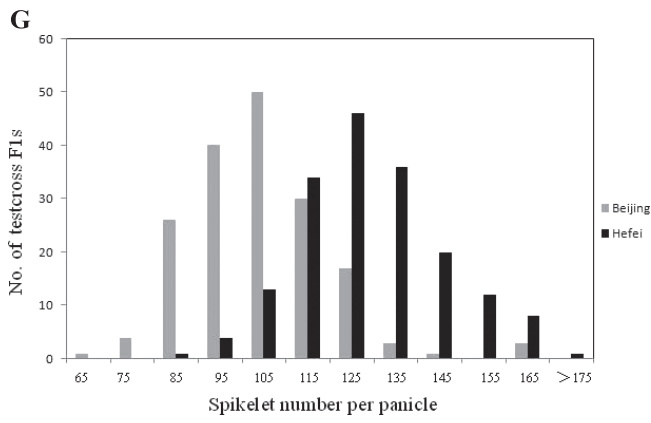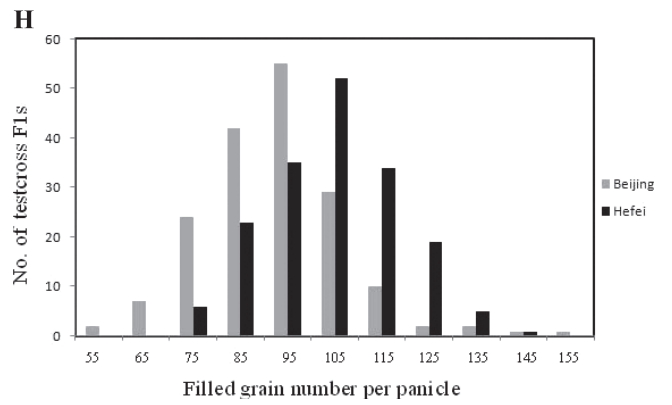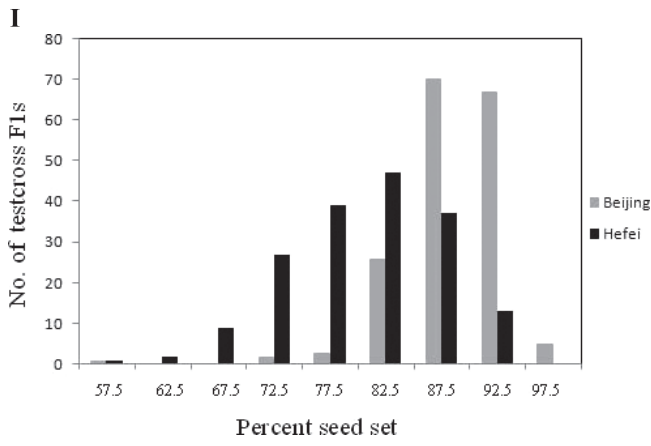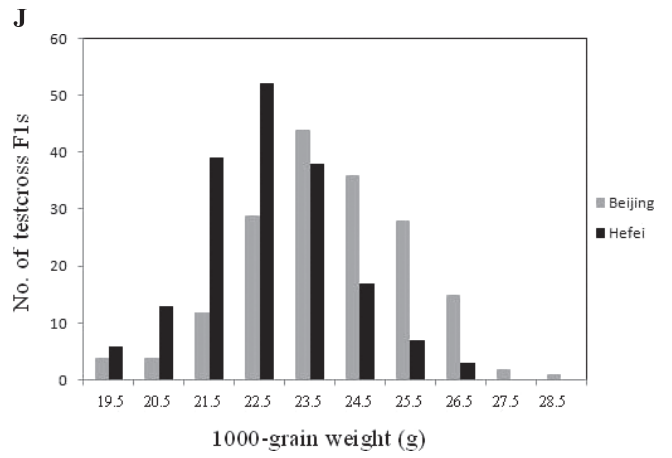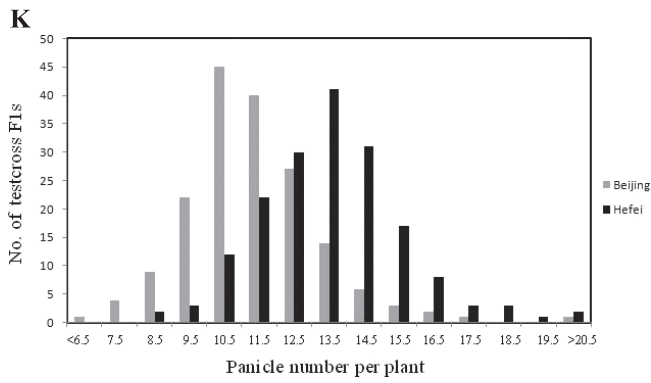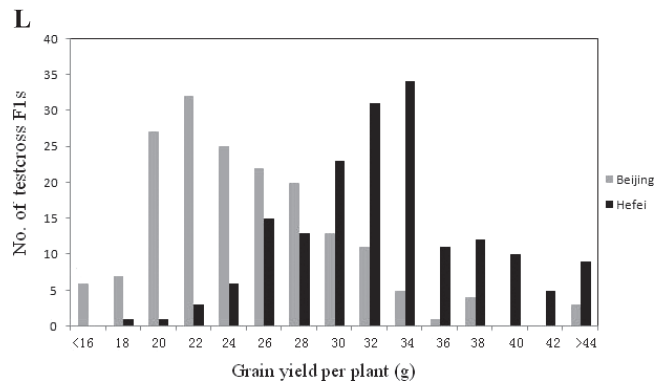

**Supplemental Fig. 1.** (continued)
